# Supplementary material
Source: MDPI journal article supplement (https://www.mdpi.com/2073-4344/13/8/1177)
Supplement: s1 [file s1]

## Supplementary information

# Optimizing Citrate Combustion Synthesis of A-Site-Deficient La,Mn-Based Perovskites: Application for Catalytic CH<sub>4</sub> Combustion in Stoichiometric Conditions

Andrea Osti \*, Lorenzo Rizzato, Jonathan Cavazzani and Antonella Glisenti \*

Department of Chemical Sciences, University of Padova, Via F. Marzolo, 1, 35131 – Padova, Italy

\* Correspondence: andrea.osti.1@phd.unipd.it (A.O.); antonella.glisenti@unipd.it (A.G.)

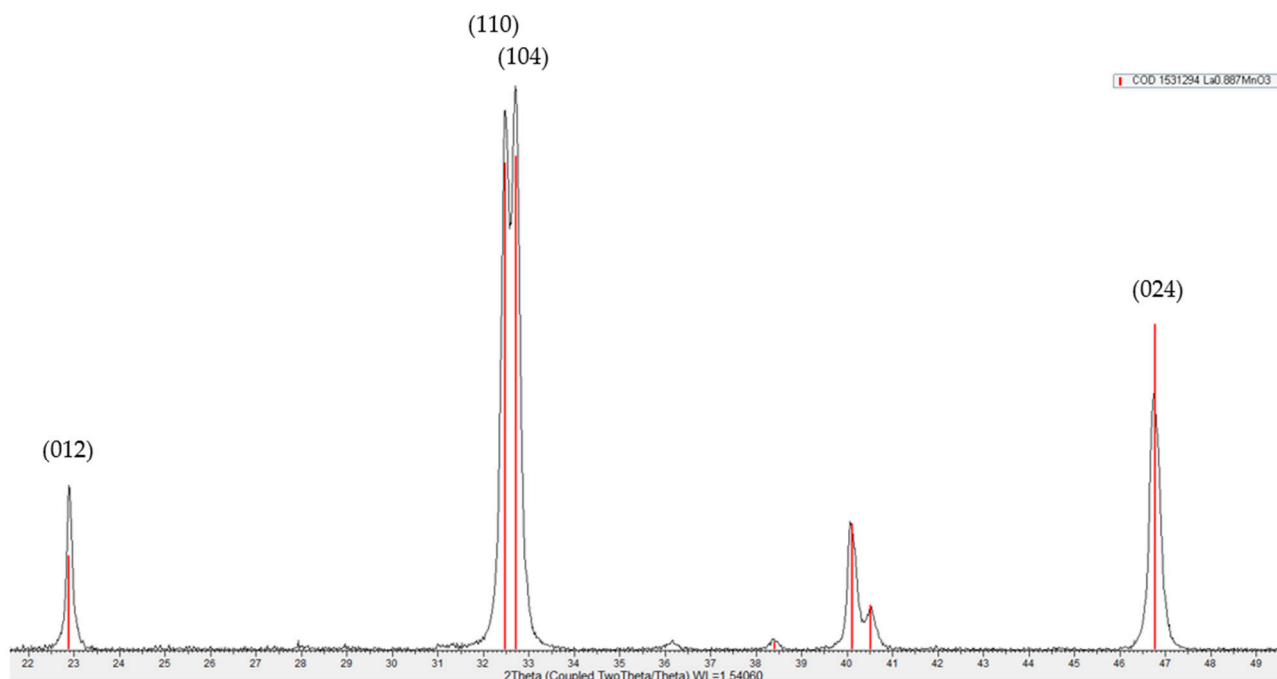

**Figure S1.** Extract of the XRD pattern of La<sub>0.8</sub>MnO<sub>3</sub>-NH<sub>3</sub>-CA1.1 sample as example, showing the good matching with hexagonal La<sub>0.887</sub>MnO<sub>3</sub> phase (COD reference 1531294). The reported (hkl) indexes are relative to the reflections fitted to obtain crystallite size by Williamson-Hall method, according to Equation S1:

$$\beta \cos \theta = \frac{K\lambda}{d} + 4\varepsilon \sin \theta \quad (\text{S1})$$

where  $\beta$  is the full width at half maximum of each reflection (obtained by gaussian fitting),  $\theta$  is the reflection angle (radians),  $K$  a constant assumed 0.90,  $\lambda$  the irradiation wavelength (0.154 nm, Cu K $\alpha$ ),  $d$  the average crystallite size (nm) and  $\varepsilon$  the crystal strain. By linear fitting of  $\beta \cos \theta$  as function of  $4\varepsilon \sin \theta$ , the crystallite size  $d$  is obtained from the intercept and the strain  $\varepsilon$  from the slope.

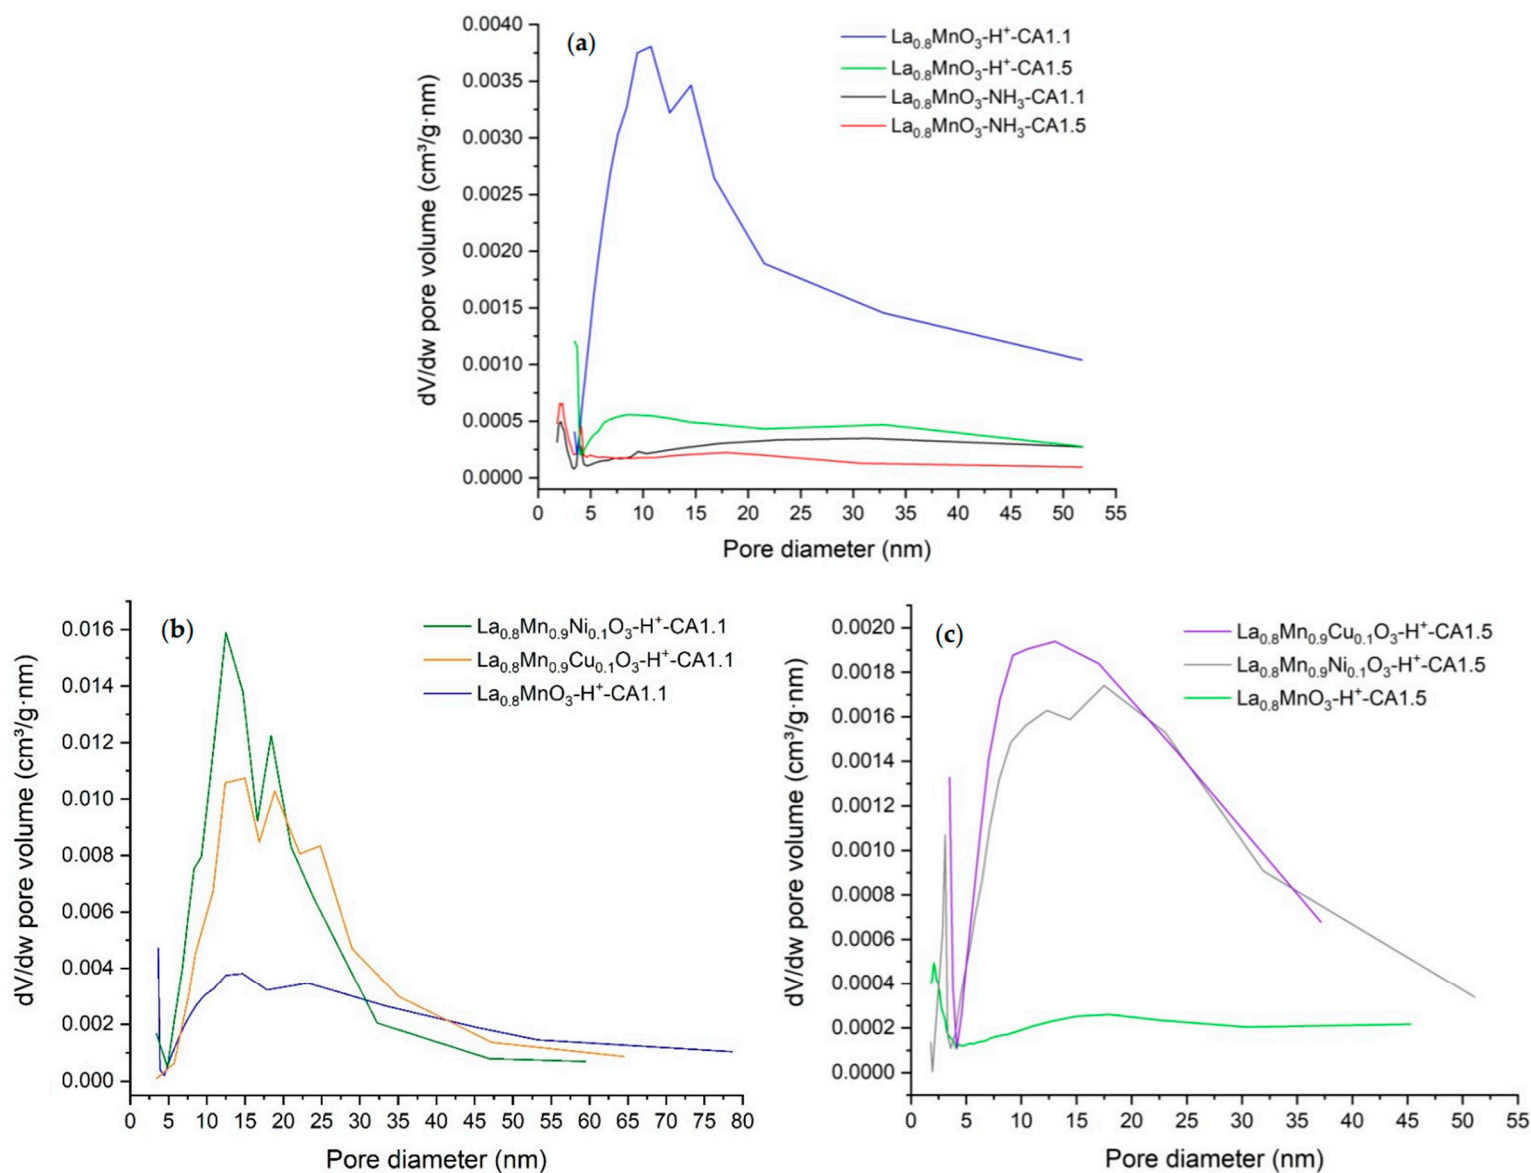

**Figure S2.** Pore size distribution of the prepared catalysts, according to BJH model, obtained from the desorption branch of  $\text{N}_2$  isotherms: (a) the four  $\text{La}_{0.8}\text{MnO}_3$  samples, (b) Ni- and Cu-doped samples with CA1.1, compared to  $\text{La}_{0.8}\text{MnO}_3\text{-H}^+\text{-CA1.1}$ , (c) Ni- and Cu-doped samples with CA1.5, compared to  $\text{La}_{0.8}\text{MnO}_3\text{-H}^+\text{-CA1.5}$ .

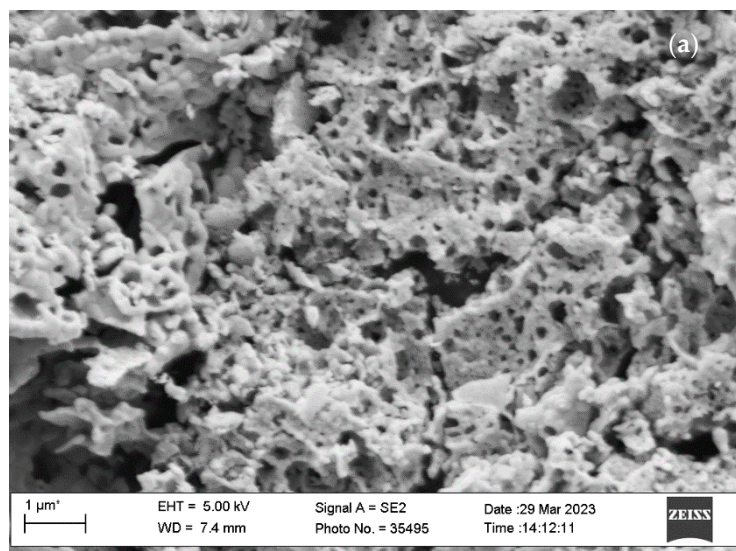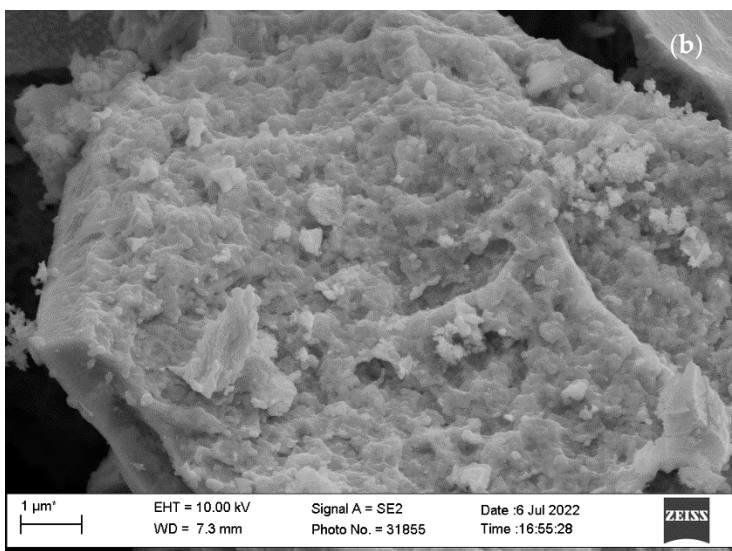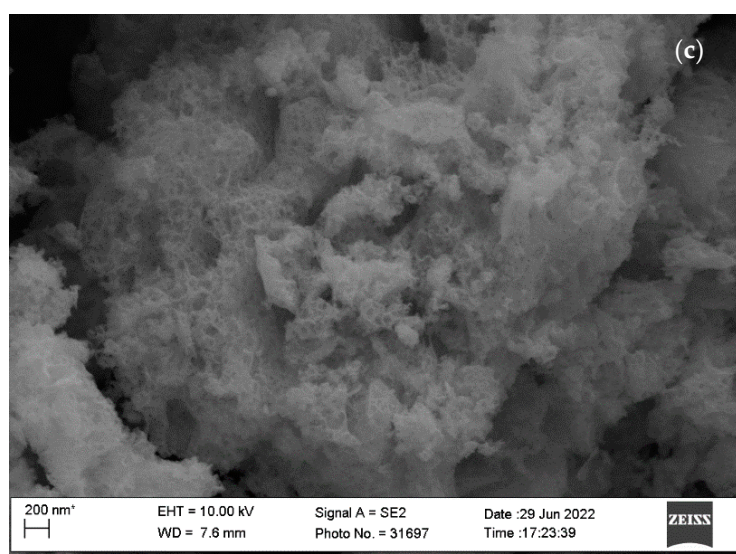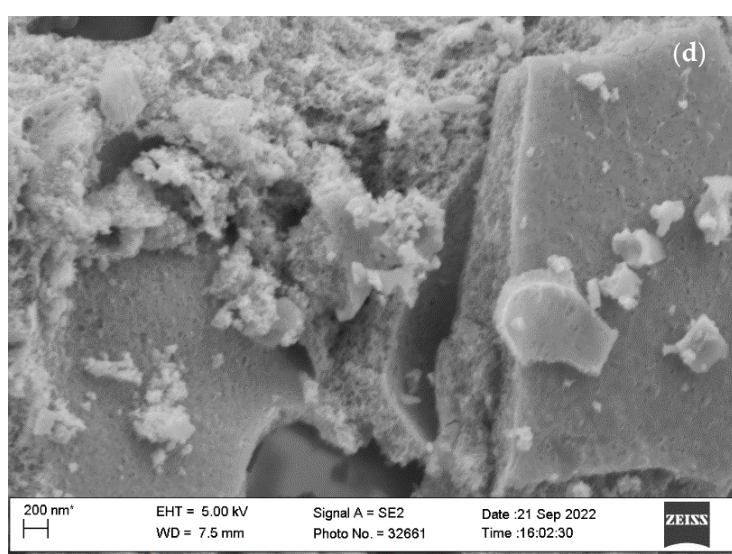

**Figure S3.** SEM micrographs of: (a)  $\text{La}_{0.8}\text{MnO}_3\text{-NH}_3\text{-CA1.5}$ ; (b)  $\text{La}_{0.8}\text{MnO}_3\text{-H}^+\text{-CA1.5}$ ; (c)  $\text{La}_{0.8}\text{Mn}_{0.9}\text{Cu}_{0.1}\text{O}_3\text{-H}^+\text{-CA1.1}$ ; (d)  $\text{La}_{0.8}\text{Mn}_{0.9}\text{Cu}_{0.1}\text{O}_3\text{-H}^+\text{-CA1.5}$ . Images (a,b) are taken at 25000 $\times$  magnification, images (c,d) at 50000 $\times$  magnification.

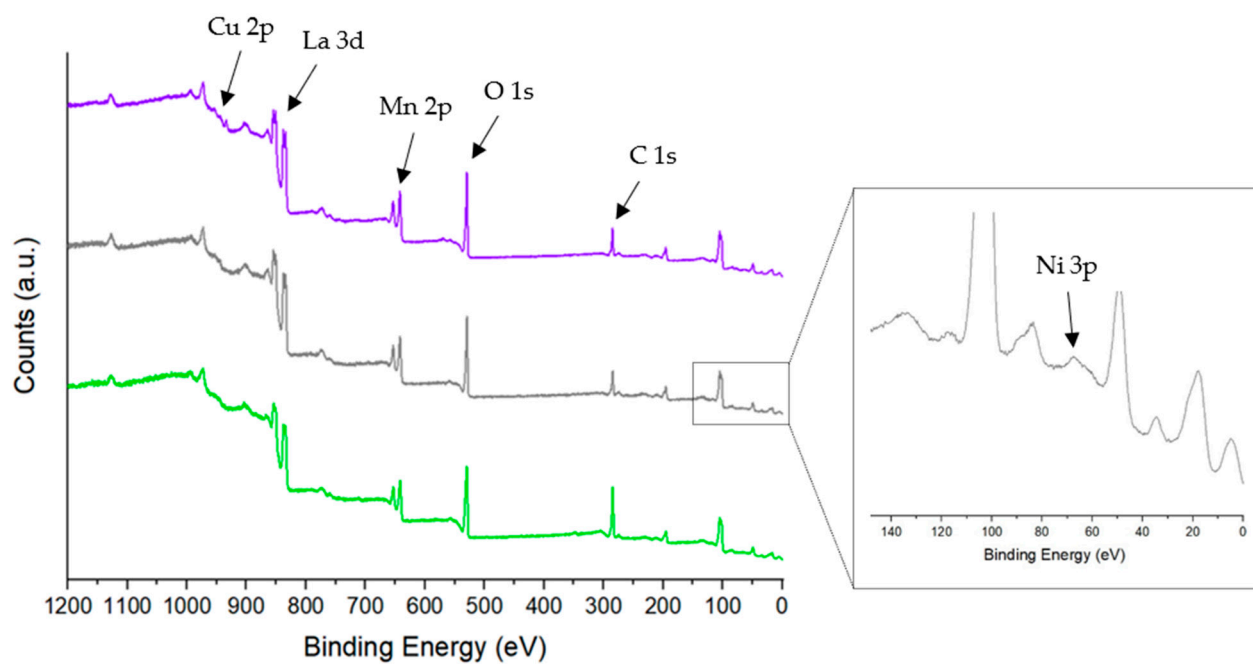

**Figure S4.** Representative XPS survey spectra of  $\text{H}^+$ -CA1.5 samples and identification of the main photopeaks:  $\text{La}_{0.8}\text{MnO}_3$  (green);  $\text{La}_{0.8}\text{Mn}_{0.9}\text{Ni}_{0.1}\text{O}_3$  (grey), with zoom on the low binding energy region to highlight Ni3p photopeak;  $\text{La}_{0.8}\text{Mn}_{0.9}\text{Cu}_{0.1}\text{O}_3$  (violet).

**Table S1.** EDX and XPS composition of the prepared perovskites, also considering the oxygen content (nominal amounts according to stoichiometry are reported in brackets).

| Sample                                                                                      |           | O (at%) | La (at%) | Mn (at%) | Ni or Cu (at%) |
|---------------------------------------------------------------------------------------------|-----------|---------|----------|----------|----------------|
| La <sub>0.8</sub> MnO <sub>3</sub> -NH <sub>3</sub> -CA1.1                                  | EDX       | 64.6    | 17.0     | 18.4     | /              |
|                                                                                             | XPS       | 72.9    | 12.2     | 14.9     | /              |
|                                                                                             | (nominal) | (62.5)  | (16.7)   | (20.8)   | /              |
| La <sub>0.8</sub> MnO <sub>3</sub> -NH <sub>3</sub> -CA1.5                                  | EDX       | 72.7    | 12.6     | 14.7     | /              |
|                                                                                             | XPS       | 69.3    | 13.2     | 17.5     | /              |
|                                                                                             | (nominal) | (62.5)  | (16.7)   | (20.8)   | /              |
| La <sub>0.8</sub> MnO <sub>3</sub> -H <sup>+</sup> -CA1.1                                   | EDX       | 66.1    | 17.0     | 16.9     | /              |
|                                                                                             | XPS       | 71.6    | 11.8     | 16.6     | /              |
|                                                                                             | (nominal) | (62.5)  | (16.7)   | (20.8)   | /              |
| La <sub>0.8</sub> MnO <sub>3</sub> -H <sup>+</sup> -CA1.5                                   | EDX       | 65.0    | 16.3     | 18.7     | /              |
|                                                                                             | XPS       | 74.4    | 10.7     | 14.9     | /              |
|                                                                                             | (nominal) | (62.5)  | (16.7)   | (20.8)   | /              |
| La <sub>0.8</sub> Mn <sub>0.9</sub> Ni <sub>0.1</sub> O <sub>3</sub> -H <sup>+</sup> -CA1.1 | EDX       | 67.0    | 16.1     | 15.3     | 1.6            |
|                                                                                             | XPS       | 66.5    | 12.7     | 20.1     | 0.7            |
|                                                                                             | (nominal) | (62.5)  | (16.7)   | (18.8)   | (2.1)          |
| La <sub>0.8</sub> Mn <sub>0.9</sub> Ni <sub>0.1</sub> O <sub>3</sub> -H <sup>+</sup> -CA1.5 | EDX       | 63.3    | 17.7     | 16.8     | 2.2            |
|                                                                                             | XPS       | 66.5    | 13.3     | 18.8     | 1.4            |
|                                                                                             | (nominal) | (62.5)  | (16.7)   | (18.8)   | (2.1)          |
| La <sub>0.8</sub> Mn <sub>0.9</sub> Cu <sub>0.1</sub> O <sub>3</sub> -H <sup>+</sup> -CA1.1 | EDX       | 67.7    | 15.5     | 15.6     | 1.2            |
|                                                                                             | XPS       | 63.5    | 13.6     | 18.8     | 4.1            |
|                                                                                             | (nominal) | (62.5)  | (16.7)   | (18.8)   | (2.1)          |
| La <sub>0.8</sub> Mn <sub>0.9</sub> Cu <sub>0.1</sub> O <sub>3</sub> -H <sup>+</sup> -CA1.5 | EDX       | 64.9    | 16.9     | 16.0     | 2.2            |
|                                                                                             | XPS       | 65.5    | 12.3     | 18.5     | 3.7            |
|                                                                                             | (nominal) | (62.5)  | (16.7)   | (18.7)   | (2.1)          |
